# Supplementary material
Source: PubMed Central journal article supplement (PMC3668820)
Supplement: JCI67294sd.pdf [file JCI67294sd.pdf]

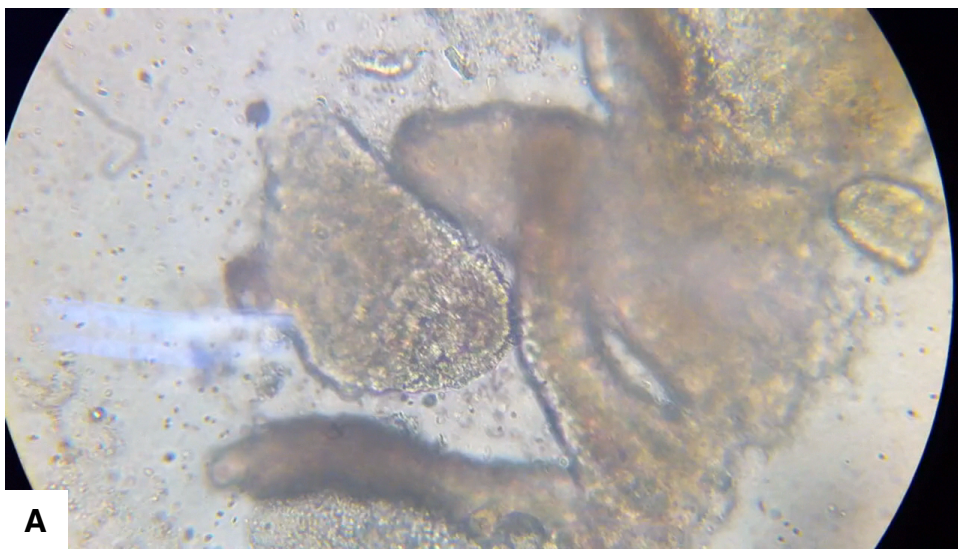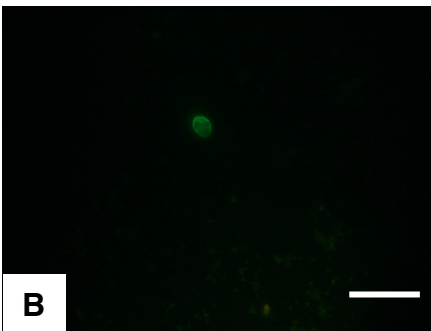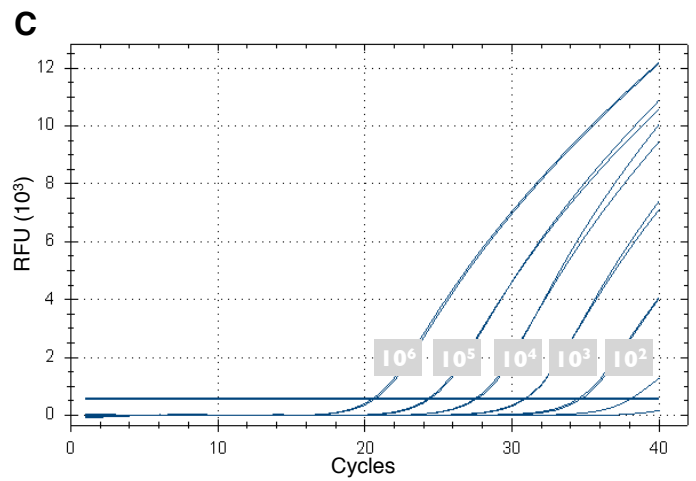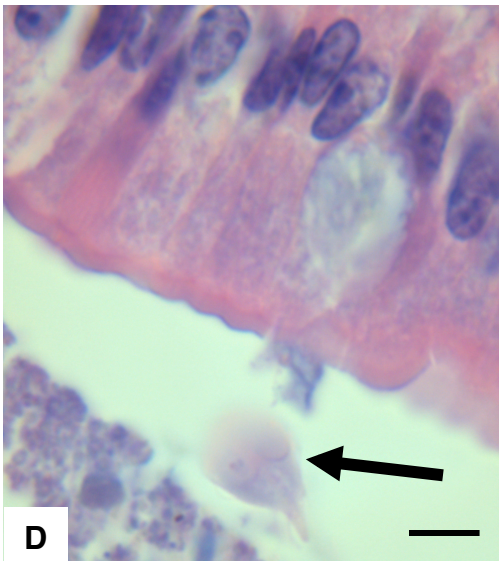

**Figure S1.** Detection methods used in *G. lamblia* H3 infection model. **(A)** Video (10x) of duodenal tissue homogenate of RP: *G. lamblia* challenged mouse on 8 dpi showing motile trophozoites juxtaposed to the mucosal fragments. **(B)** IFA-staining (Merifluor) of pooled cecal homogenate in 10% formalin at 1:100 dilution of 3 RP: *G. lamblia* challenged mice 8 dpi. Scale bar = 50 microns. **(C)** Screen shot of *G. lamblia* 18S qPCR of standard curve dilutions (10<sup>6</sup>-10<sup>2</sup>) *G. lamblia* H3 cysts spiked into pooled mouse pellets of uninfected mice. Quantification of *G. lamblia* parasites in samples from infected mice was derived by determining the quantification of DNA in each sample divided by the weight of the original stool/tissue (grams) prior to sample extraction. **(D)** H&E section of duodenal epithelium 64 days post-infection at 100x with *G. lamblia* trophozoite in ventral orientation (arrow) (visible are the ventral discs and one nucleus) next to a mucus-secreting goblet cell. Note the smooth eosinophilic staining of the parasite and the more basophilic staining of the mucus. Scale bar = 5 microns.

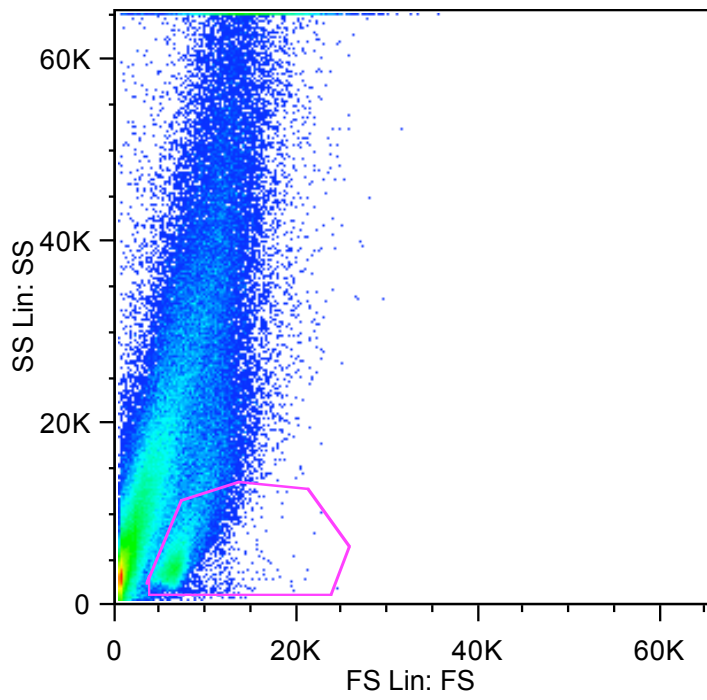

**Figure S2.** Representative flow cytometry gating strategy on lamina propria leukocytes as forward versus side-scatter.

## Supplementary Table

| Target gene    | cDNA library catalogue gene | Primer Name   | Primer Sequence (5'-3')   |
|----------------|-----------------------------|---------------|---------------------------|
| HGPRT          | cDNANM_013556.2             | murHPRT1-32F  | GCAAATACGAGGAGTCCTGTTGA   |
|                |                             | murHPRT1-132R | TCATAGAAGGTTTCATGCAAAAAGC |
| $\beta$ -actin | cDNANM_007393               | ActB-157F     | GCTCCTCCTGAGCGCAAGT       |
|                |                             | ActB-257R     | TCATCGTACTCCTGCTTGCTGAT   |
| TNF- $\alpha$  | cDNANM_009395               | Tnfaip1_F121  | GCAACTCTGATGATCACCTGCTA   |
|                |                             | Tnfaip1_R220  | TCCCAATGACATCCTTGATG      |
| CXCR1 (IL8/KC) | cDNANM_178241               | Cxcr1_F134    | CTGGGTGAAGCCACAACAGA      |
|                |                             | Cxcr1_R233    | GCCCGTAGCAGACCAGCATA      |
| IFN- $\gamma$  | cDNANM_008337               | lfng_F167     | CTGGAGGAACTGGCAAAGG       |
|                |                             | lfng_R269     | GATGGCCTGATTGTCTTTCAAGA   |
| IL12           | cDNANM_008351               | IL12a_F276    | ACCCTGTGCCTTGGTAGCAT      |
|                |                             | IL12a_R375    | TGATCTGCTGATGGTTGTGATTC   |
| IL17a          | cDNANM_010552               | IL17a_F296    | ACCGCAATGAAGACCCTGAT      |
|                |                             | IL17a_R395    | ATGTGGTGGTCCAGCTTTCC      |
| IL22           | cDNANM_016971               | IL22_F179     | ACATCGTCAACCGCACCTTT      |
|                |                             | IL22_R278     | CTGACTCCTCGGAACAGTTTCTC   |
| IL10           | cDNANM_010548               | IL10_F39      | GGCAGCCTTGCAGAAAAGAG      |
|                |                             | IL10_R138     | CTGTACTGGCCCCTGCTGAT      |
| IL5            | cDNANM_010558               | IL5_F52       | GATGCTTCTGCACTTGAGTGTCT   |
|                |                             | IL5_R151      | CAGCTGTGTCAAGGTCTCTTTAC   |
| IL4            | cDNANR_027491               | IL4_F387      | GGCTTTTCGATGCCTGGATT      |
|                |                             | IL4_R486      | TTGCATGATGCTCTTTAGGCTTT   |

**Table S1:** Overview of gene targets primer sequences used for tissue cytokine mRNA assays. Primers were designed from the target sequences retrieved from the RefSeq Sequence Database (<http://www.ncbi.nlm.nih.gov/RefSeq/>), using the Primer Express 3.0 software (Applied Biosystems) and synthesized per the manufacturer (Invitrogen). F=Forward, R=Reverse
